# Supplementary material for: A general approach to intermolecular carbonylation of arene C–H bonds to ketones through catalytic aroyl triflate formation
Source: Springer Nature journal article supplement (doi:10.1038/nchem.2903), 2017-12-11
Supplement: 41557_2018_BFnchem2903_MOESM188_ESM.mol [file 41557_2018_BFnchem2903_MOESM188_ESM.mol]

nchem.2903-comp3a.mol
  ChemDraw11241711502D

 17 17  0  0  0  0  0  0  0  0999 V2000
   -1.4830    0.6151    0.0000 C   0  0  0  0  0  0  0  0  0  0  0  0
   -1.4830   -0.2099    0.0000 C   0  0  0  0  0  0  0  0  0  0  0  0
   -0.7685   -0.6224    0.0000 C   0  0  0  0  0  0  0  0  0  0  0  0
   -0.0540   -0.2099    0.0000 C   0  0  0  0  0  0  0  0  0  0  0  0
   -0.0540    0.6151    0.0000 C   0  0  0  0  0  0  0  0  0  0  0  0
   -0.7685    1.0276    0.0000 C   0  0  0  0  0  0  0  0  0  0  0  0
    0.6604    1.0276    0.0000 C   0  0  0  0  0  0  0  0  0  0  0  0
    0.6604    1.8526    0.0000 O   0  0  0  0  0  0  0  0  0  0  0  0
   -2.1975   -0.6224    0.0000 Br  0  0  0  0  0  0  0  0  0  0  0  0
    1.3749    0.6151    0.0000 O   0  0  0  0  0  0  0  0  0  0  0  0
    1.3749   -0.2075    0.0000 S   0  0  0  0  0  0  0  0  0  0  0  0
    2.1975   -0.2075    0.0000 O   0  0  0  0  0  0  0  0  0  0  0  0
    0.5524   -0.2075    0.0000 O   0  0  0  0  0  0  0  0  0  0  0  0
    1.3749   -1.0300    0.0000 C   0  0  0  0  0  0  0  0  0  0  0  0
    1.3749   -1.8526    0.0000 F   0  0  0  0  0  0  0  0  0  0  0  0
    0.6626   -1.4413    0.0000 F   0  0  0  0  0  0  0  0  0  0  0  0
    2.0873   -1.4413    0.0000 F   0  0  0  0  0  0  0  0  0  0  0  0
 14 11  1  0      
 14 15  1  0      
 14 16  1  0      
 14 17  1  0      
 11 12  2  0      
 11 13  2  0      
 10 11  1  0      
  7 10  1  0      
  1  2  2  0      
  2  3  1  0      
  3  4  2  0      
  4  5  1  0      
  5  6  2  0      
  6  1  1  0      
  5  7  1  0      
  7  8  2  0      
  2  9  1  0      
M  STY  1   1 SUP
M  SLB  1   1   1
M  SAL   1  8  10  11  12  13  14  15  16  17
M  SBL   1  1   8
M  SMT   1 OTf
M  SBV   1   8   -0.7145    0.4125
M  END
