# Supplementary material for: A general approach to intermolecular carbonylation of arene C–H bonds to ketones through catalytic aroyl triflate formation
Source: Springer Nature journal article supplement (doi:10.1038/nchem.2903), 2017-12-11
Supplement: 41557_2018_BFnchem2903_MOESM197_ESM.mol [file 41557_2018_BFnchem2903_MOESM197_ESM.mol]

nchem.2903-comp4b.mol
  ChemDraw11241714362D

 31 28  0  0  0  0  0  0  0  0999 V2000
    1.3641   -0.9740    0.0000 P   0  0  0  0  0  0  0  0  0  0  0  0
    0.9342   -1.6781    0.0000 C   0  0  0  0  0  0  0  0  0  0  0  0
    1.3289   -2.4026    0.0000 C   0  0  0  0  0  0  0  0  0  0  0  0
    0.5042   -2.3822    0.0000 C   0  0  0  0  0  0  0  0  0  0  0  0
    0.1094   -1.6578    0.0000 C   0  0  0  0  0  0  0  0  0  0  0  0
    2.0682   -1.4040    0.0000 C   0  0  0  0  0  0  0  0  0  0  0  0
    2.7723   -1.8340    0.0000 C   0  0  0  0  0  0  0  0  0  0  0  0
    2.7926   -1.0092    0.0000 C   0  0  0  0  0  0  0  0  0  0  0  0
    2.0479   -2.2288    0.0000 C   0  0  0  0  0  0  0  0  0  0  0  0
    1.7941   -0.2700    0.0000 C   0  0  0  0  0  0  0  0  0  0  0  0
    2.6188   -0.2903    0.0000 C   0  0  0  0  0  0  0  0  0  0  0  0
    2.2241    0.4341    0.0000 C   0  0  0  0  0  0  0  0  0  0  0  0
    1.3993    0.4545    0.0000 C   0  0  0  0  0  0  0  0  0  0  0  0
    0.4752    0.6571    0.0000 C   0  3  0  0  0  0  0  0  0  0  0  0
   -0.2289    1.0871    0.0000 C   0  0  0  0  0  0  0  0  0  0  0  0
    1.1996    1.0519    0.0000 O   0  0  0  0  0  0  0  0  0  0  0  0
   -0.9628    0.7102    0.0000 C   0  0  0  0  0  0  0  0  0  0  0  0
   -1.6561    1.1574    0.0000 C   0  0  0  0  0  0  0  0  0  0  0  0
   -1.6561    1.9814    0.0000 C   0  0  0  0  0  0  0  0  0  0  0  0
   -0.9628    2.3582    0.0000 C   0  0  0  0  0  0  0  0  0  0  0  0
   -0.2289    1.9111    0.0000 C   0  0  0  0  0  0  0  0  0  0  0  0
   -2.3643    2.4026    0.0000 C   0  0  0  0  0  0  0  0  0  0  0  0
   -0.3993   -0.9772    0.0000 O   0  5  0  0  0  0  0  0  0  0  0  0
   -1.1971   -0.7670    0.0000 S   0  0  0  0  0  0  0  0  0  0  0  0
   -0.9869    0.0308    0.0000 O   0  0  0  0  0  0  0  0  0  0  0  0
   -1.9949   -0.5569    0.0000 C   0  0  0  0  0  0  0  0  0  0  0  0
   -2.5758   -1.1427    0.0000 F   0  0  0  0  0  0  0  0  0  0  0  0
   -2.2117    0.2391    0.0000 F   0  0  0  0  0  0  0  0  0  0  0  0
   -2.7926   -0.3467    0.0000 F   0  0  0  0  0  0  0  0  0  0  0  0
   -1.4072   -1.5648    0.0000 O   0  0  0  0  0  0  0  0  0  0  0  0
    0.4488   -0.4151    0.0000 Pd  0  0  0  0  0  0  0  0  0  0  0  0
  1  2  1  0      
  2  3  1  0      
  2  4  1  0      
  2  5  1  0      
  1  6  1  0      
  6  7  1  0      
  6  8  1  0      
  6  9  1  0      
  1 10  1  0      
 10 11  1  0      
 10 12  1  0      
 10 13  1  0      
 14 15  1  0      
 14 16  2  0      
 15 17  2  0      
 17 18  1  0      
 18 19  2  0      
 19 20  1  0      
 20 21  2  0      
 21 15  1  0      
 19 22  1  0      
 23 24  1  0      
 24 25  2  0      
 24 26  1  0      
 26 27  1  0      
 26 28  1  0      
 26 29  1  0      
 24 30  2  0      
M  CHG  2  14   1  23  -1
M  END
